# Supplementary material for: Increased Adhesion of Listeria monocytogenes Strains to Abiotic Surfaces under Cold Stress
Source: PubMed Central journal article supplement (PMC5695204; doi:10.3389/fmicb.2017.02221), 2017-11-14
Supplement: Data_Sheet_1.pdf [file Data_Sheet_1.pdf]

## Supplementary Material

### Increased adhesion of *Listeria monocytogenes* strains to abiotic surfaces under cold stress

Bo-Hyung Lee\*, Michel Hébraud, Thierry Bernardi

\* Correspondence: Bo-Hyung LEE, 2bohyung@gmail.com

#### Supplementary Figures

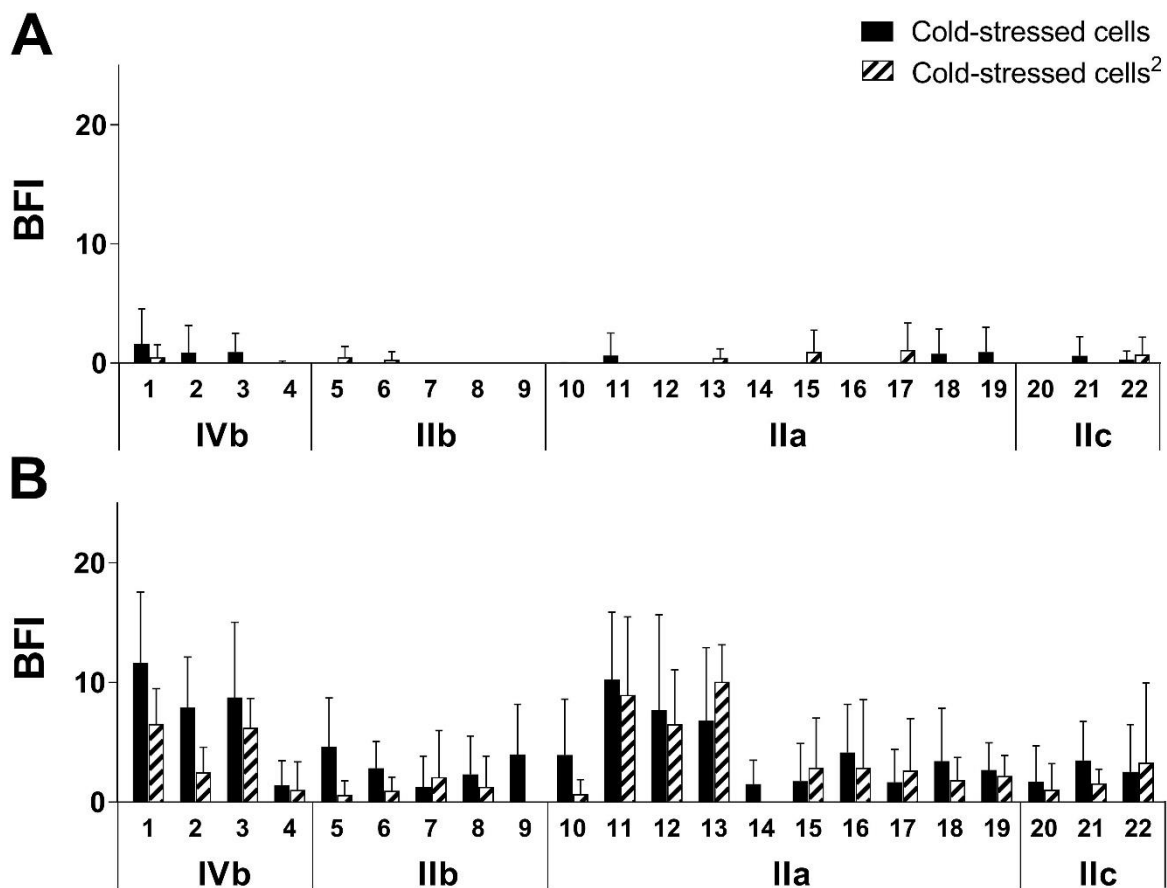

Supplementary Figure 1. Recovery of cold shock-induced adhesion is demonstrated by BRT®. Cold-stressed cells (exposed to cold shock for the first time) and cold-stressed cells<sup>2</sup> (exposed to cold shock for the second time) exhibit indistinguishable adhesion profiles. Initial inocula at OD<sub>600</sub> of 0.5 (A) and 0.17 (B). Data are presented as the mean ± standard deviation.

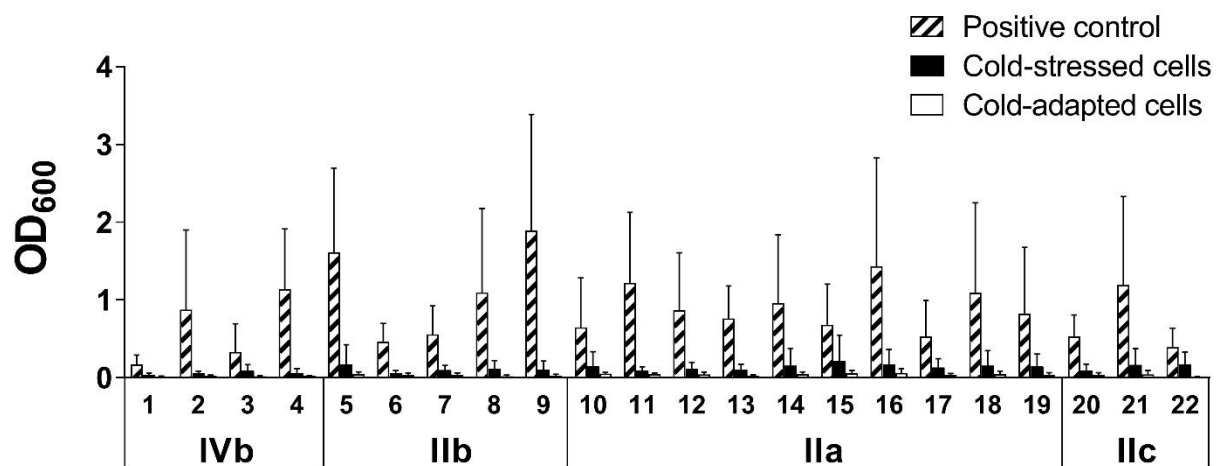

Supplementary Figure 2. Comparison of total biomass measured by CV staining. Data are shown as the mean  $\pm$  standard deviation.

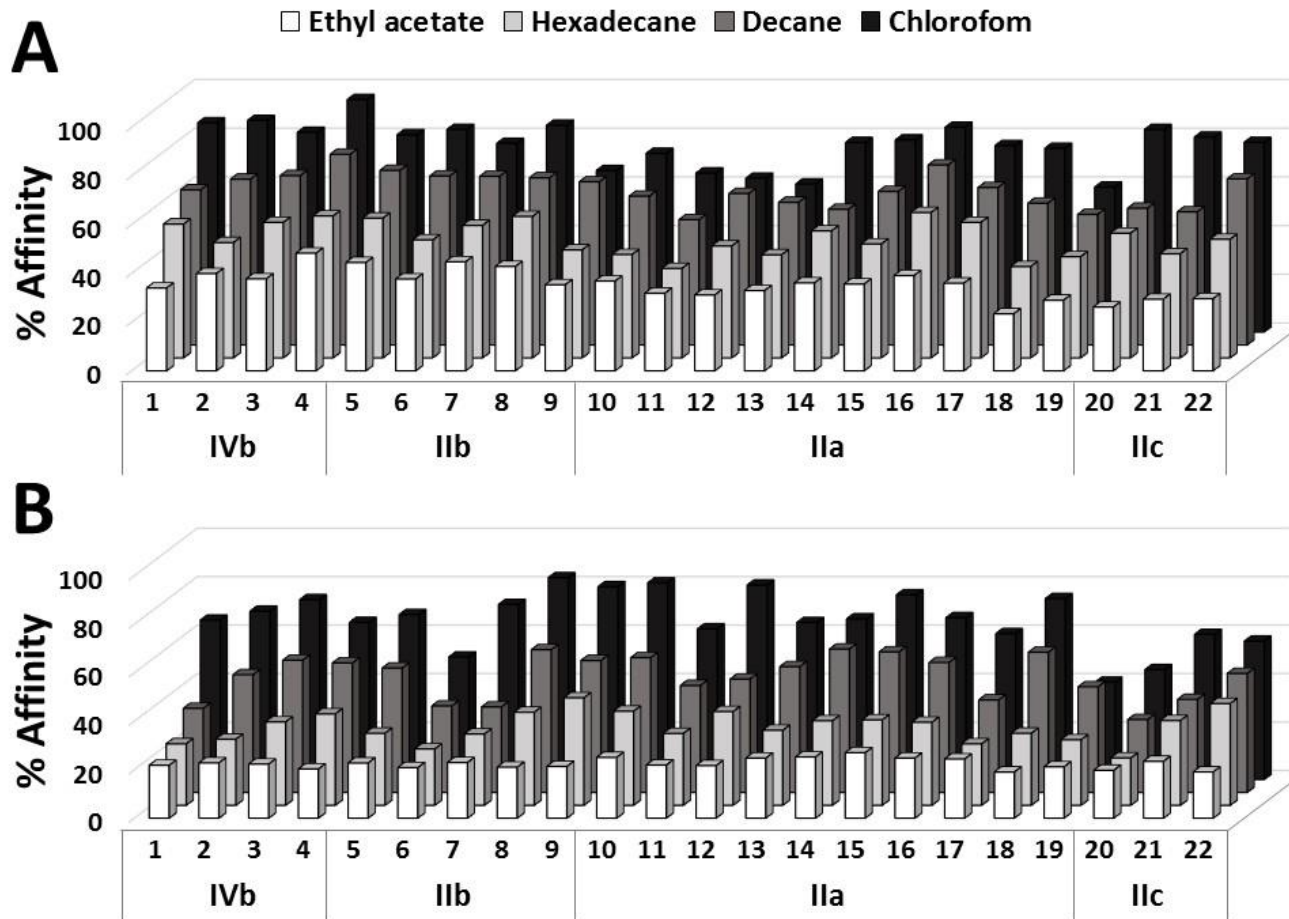

Supplementary Figure 3. Affinity (%) of 22 *L. monocytogenes* strains to solvents in stationary phase at 37°C (A) and 4°C (B). Data are shown as the mean of four measurements.
